# Supplementary material for: Physiological Age- and Sex-Related Profiles for Local (Aortic) and Regional (Carotid-Femoral, Carotid-Radial) Pulse Wave Velocity and Center-to-Periphery Stiffness Gradient, with and without Blood Pressure Adjustments: Reference Intervals and Agreement between Methods in Healthy Subjects (3–84 Years)
Source: MDPI journal article supplement (doi:10.3390/jcdd8010003), 2021-01-12
Supplement: s1 [file s1]

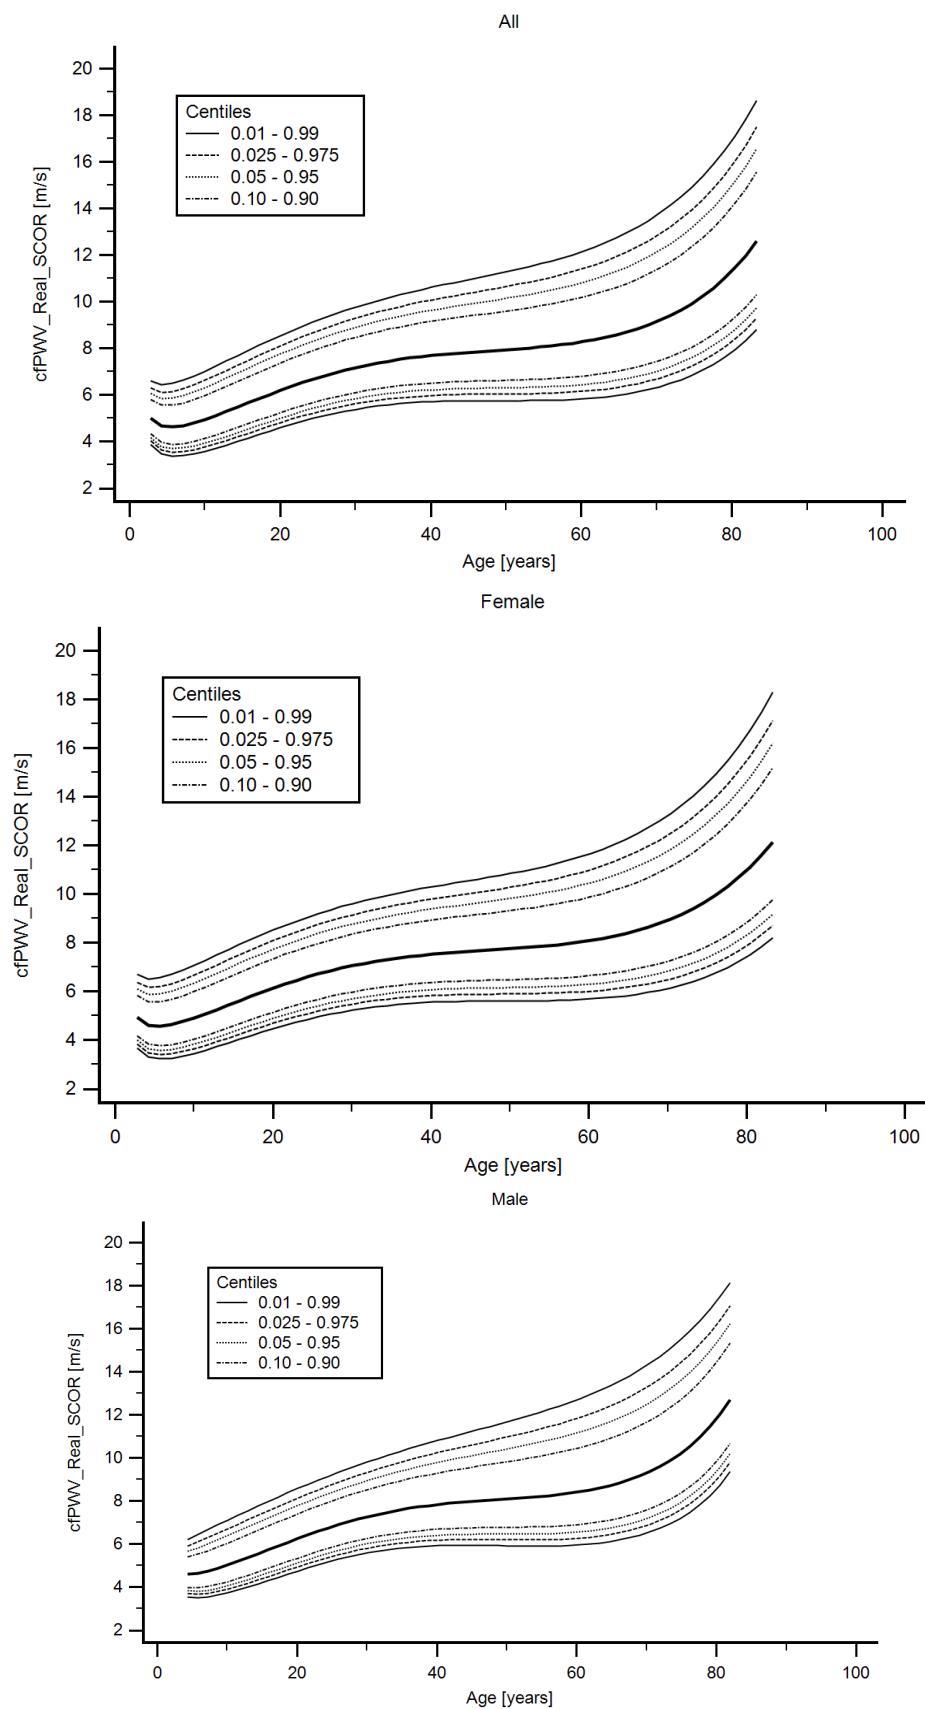

**Figure S1.** Age-related profiles for cfPWV\_Real\_SCOR, for subjects included in RIs group.

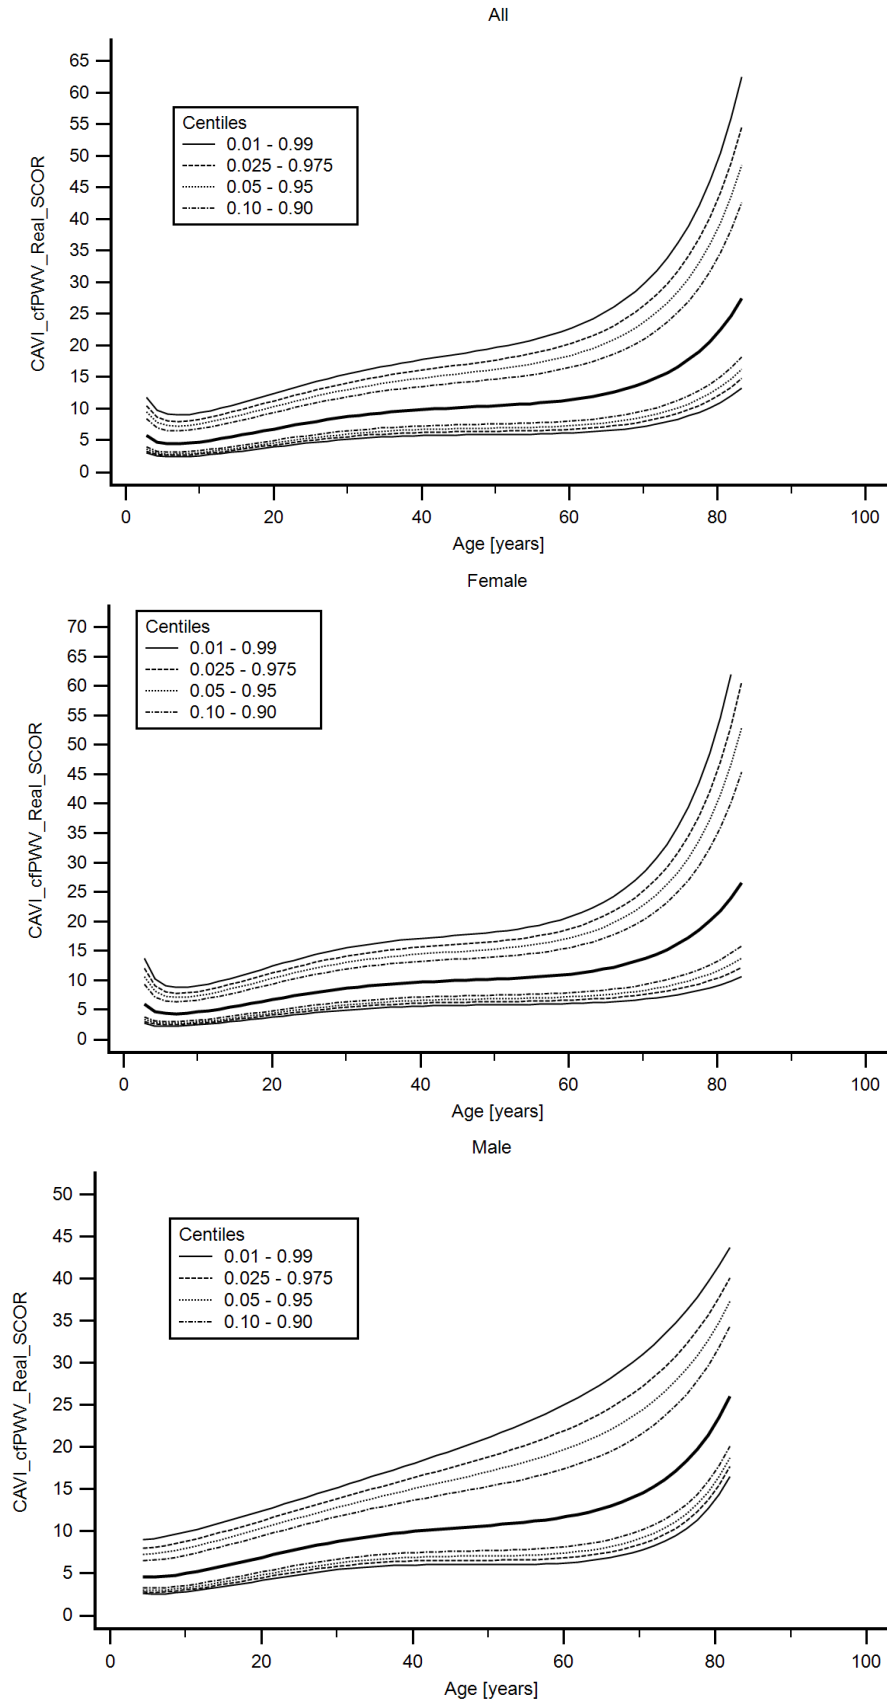

**Figure S2.** Age-related profiles for CAVI\_cfPWV\_Real\_SCOR, for subjects included in RIs group.

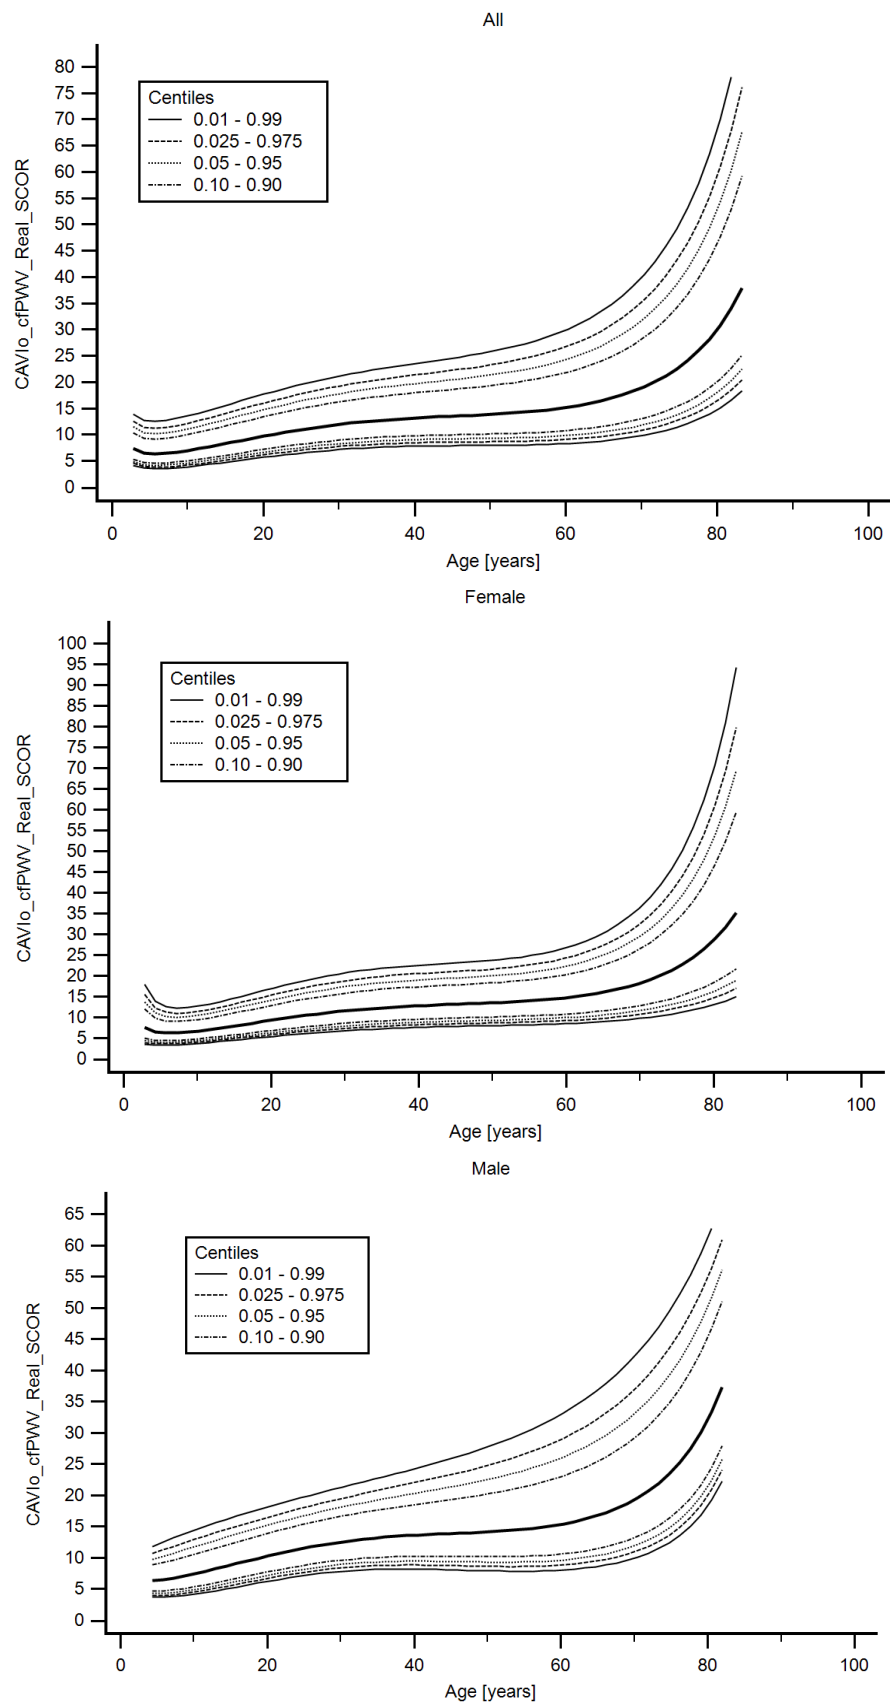

**Figure S3.** Age-related profiles for  $CAV_{Io\_cfPWV\_Real\_SCOR}$ , for subjects included in RIs group.

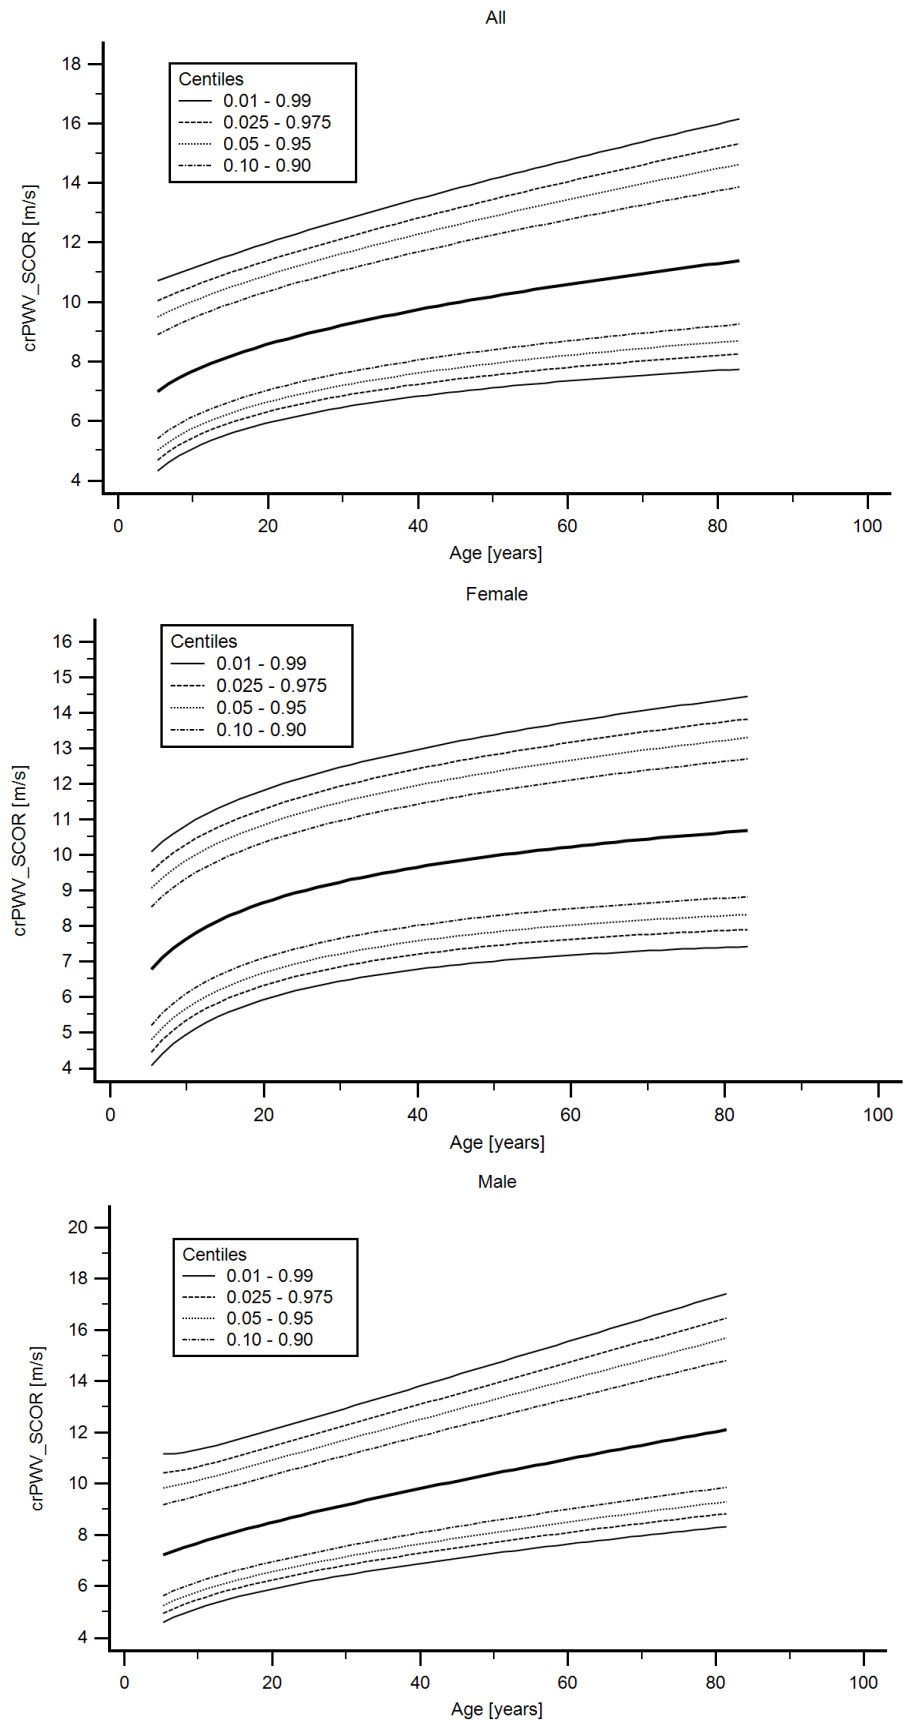

**Figure S4.** Age-related profiles for crPWV\_SCOR, for subjects included in RIs group.

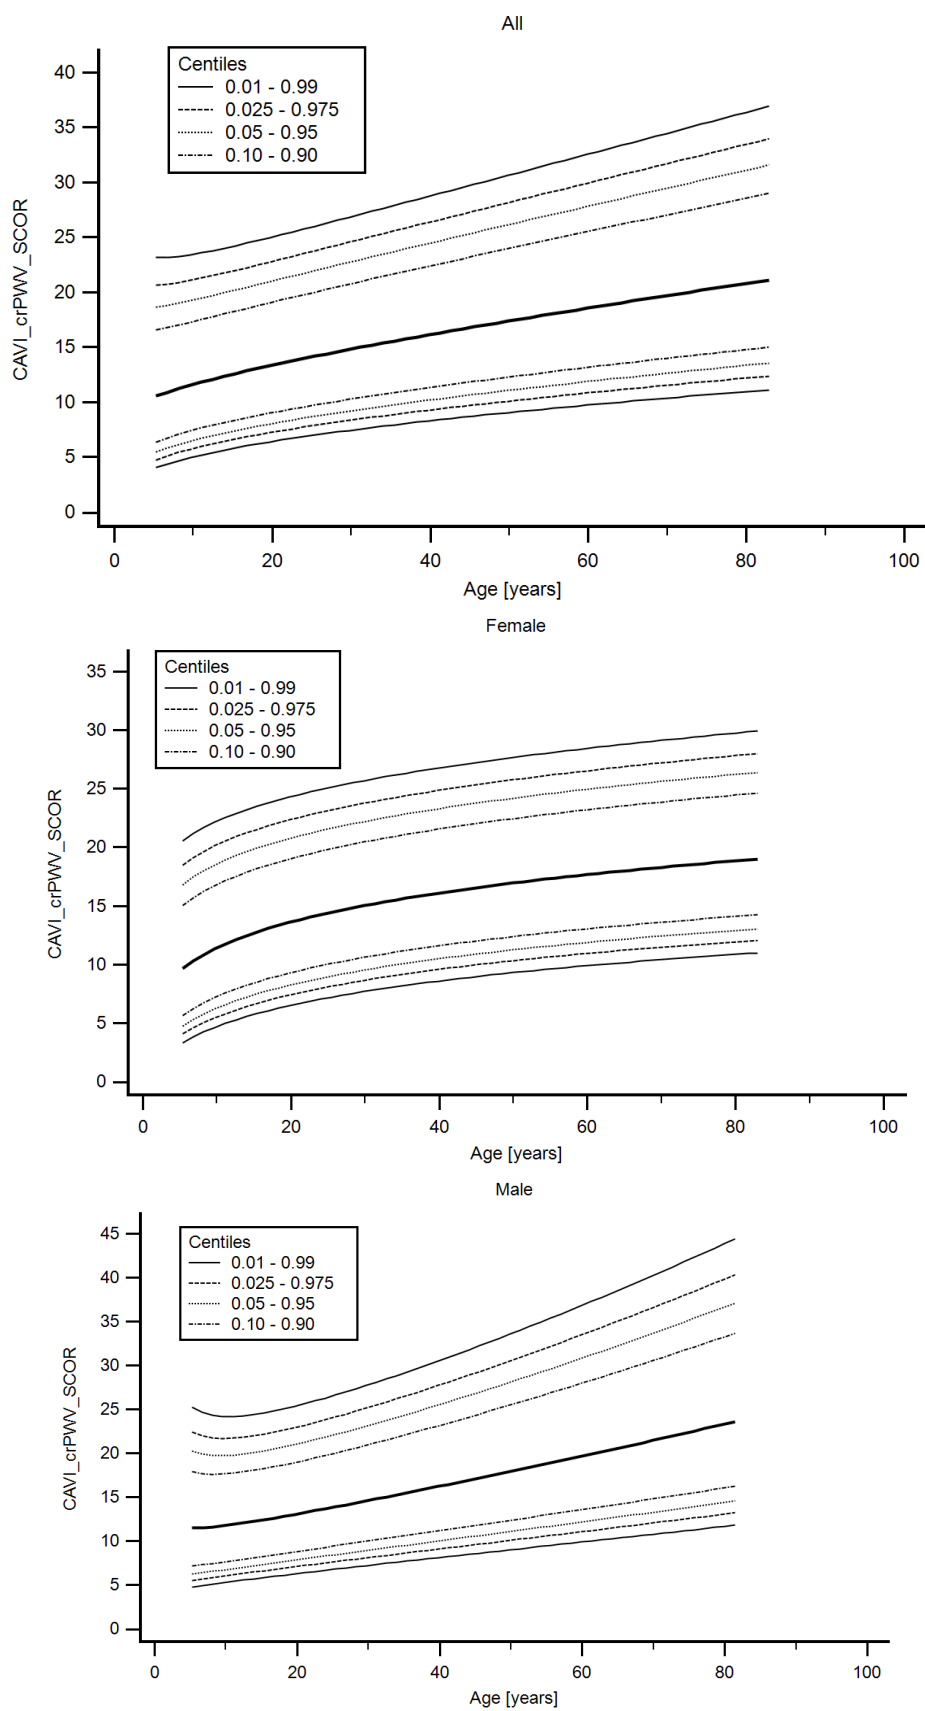

**Figure S5.** Age-related profiles for CAVI\_crPWV\_SCOR, for subjects included in RIs group.

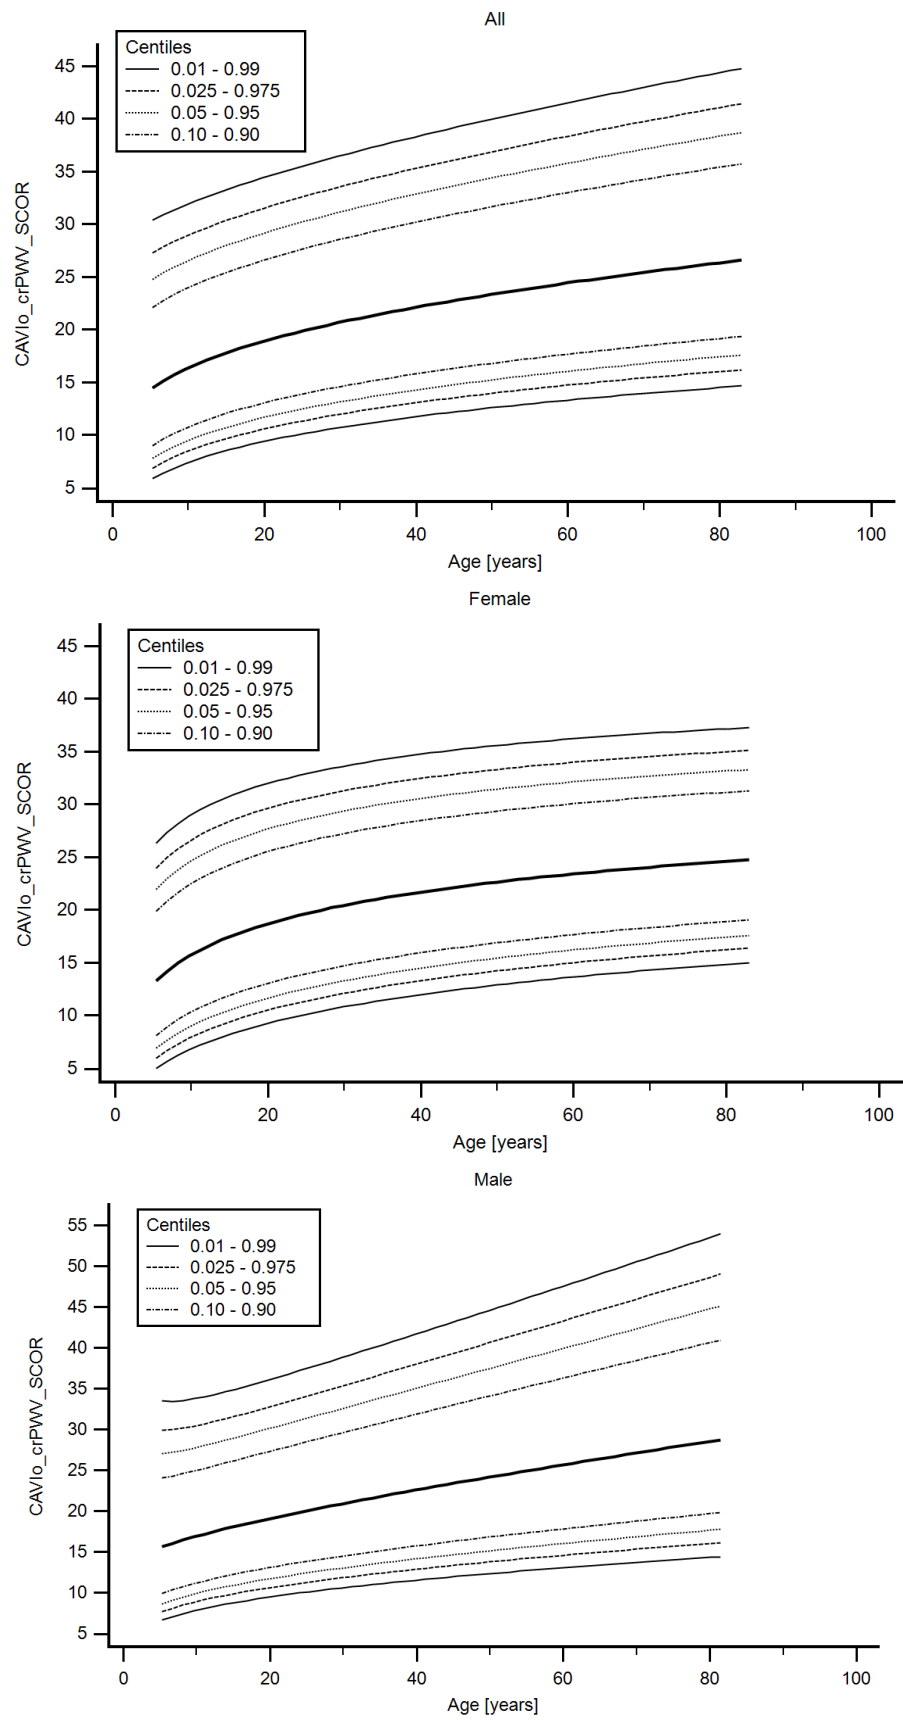

**Figure S6.** Age-related profiles for CAVIo\_crPWV\_SCOR, for subjects included in RIs group.

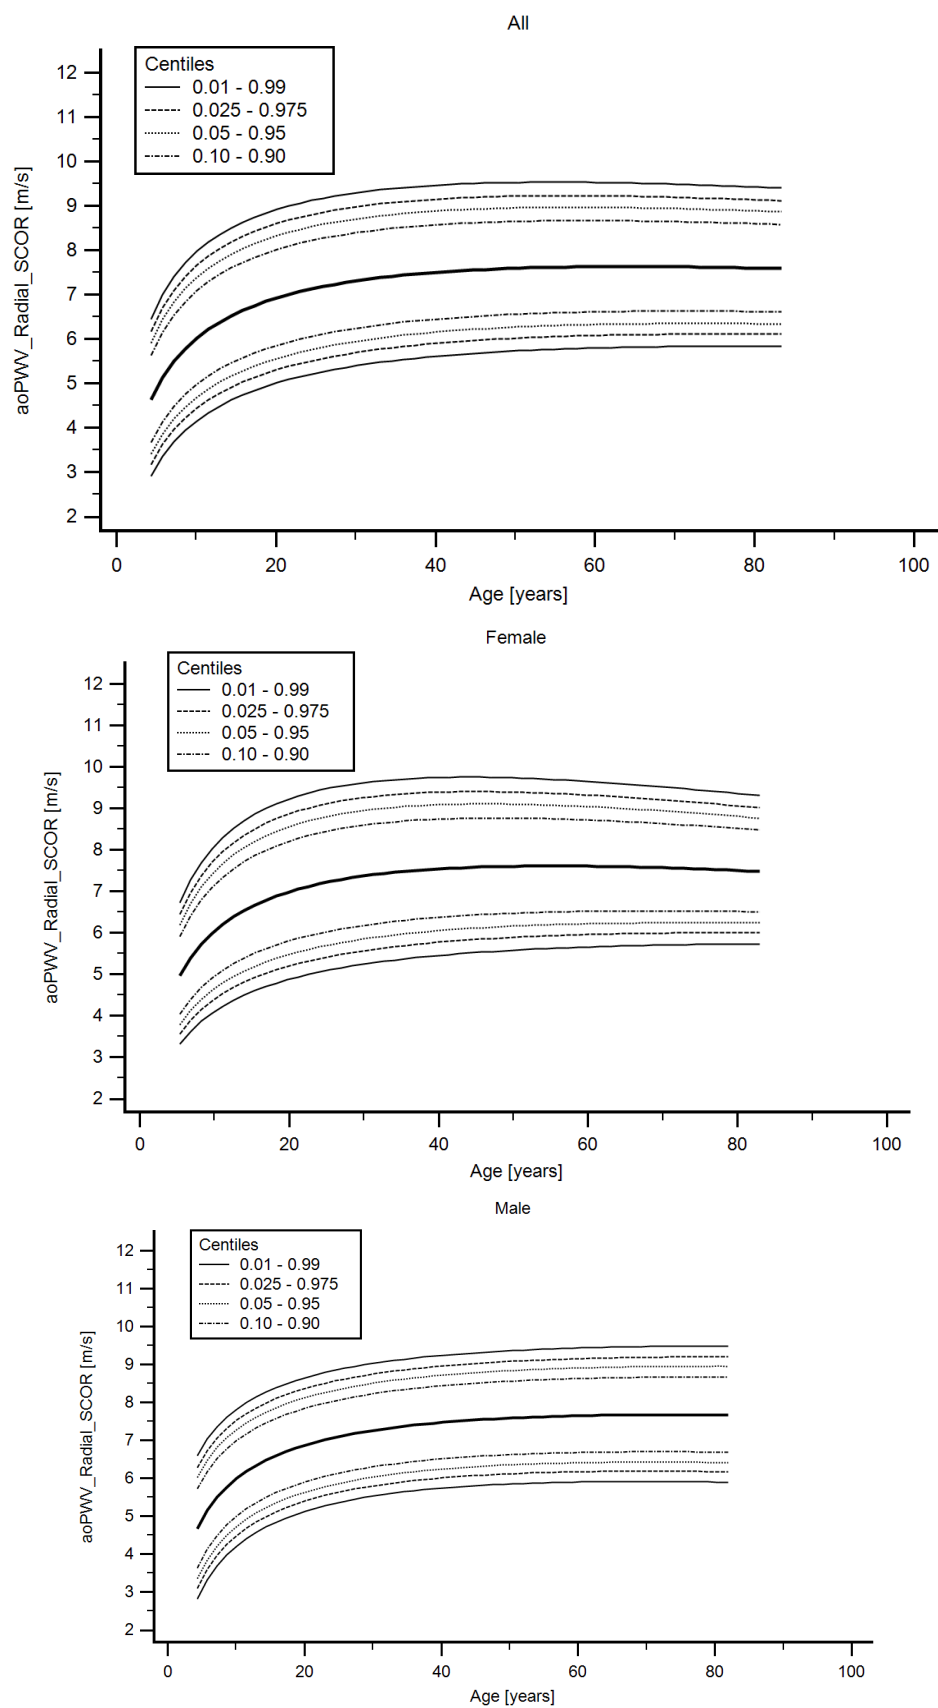

**Figure S7.** Age-related profiles for  $aoPWV\_Radial\_SCOR$ , for subjects included in RIs group.

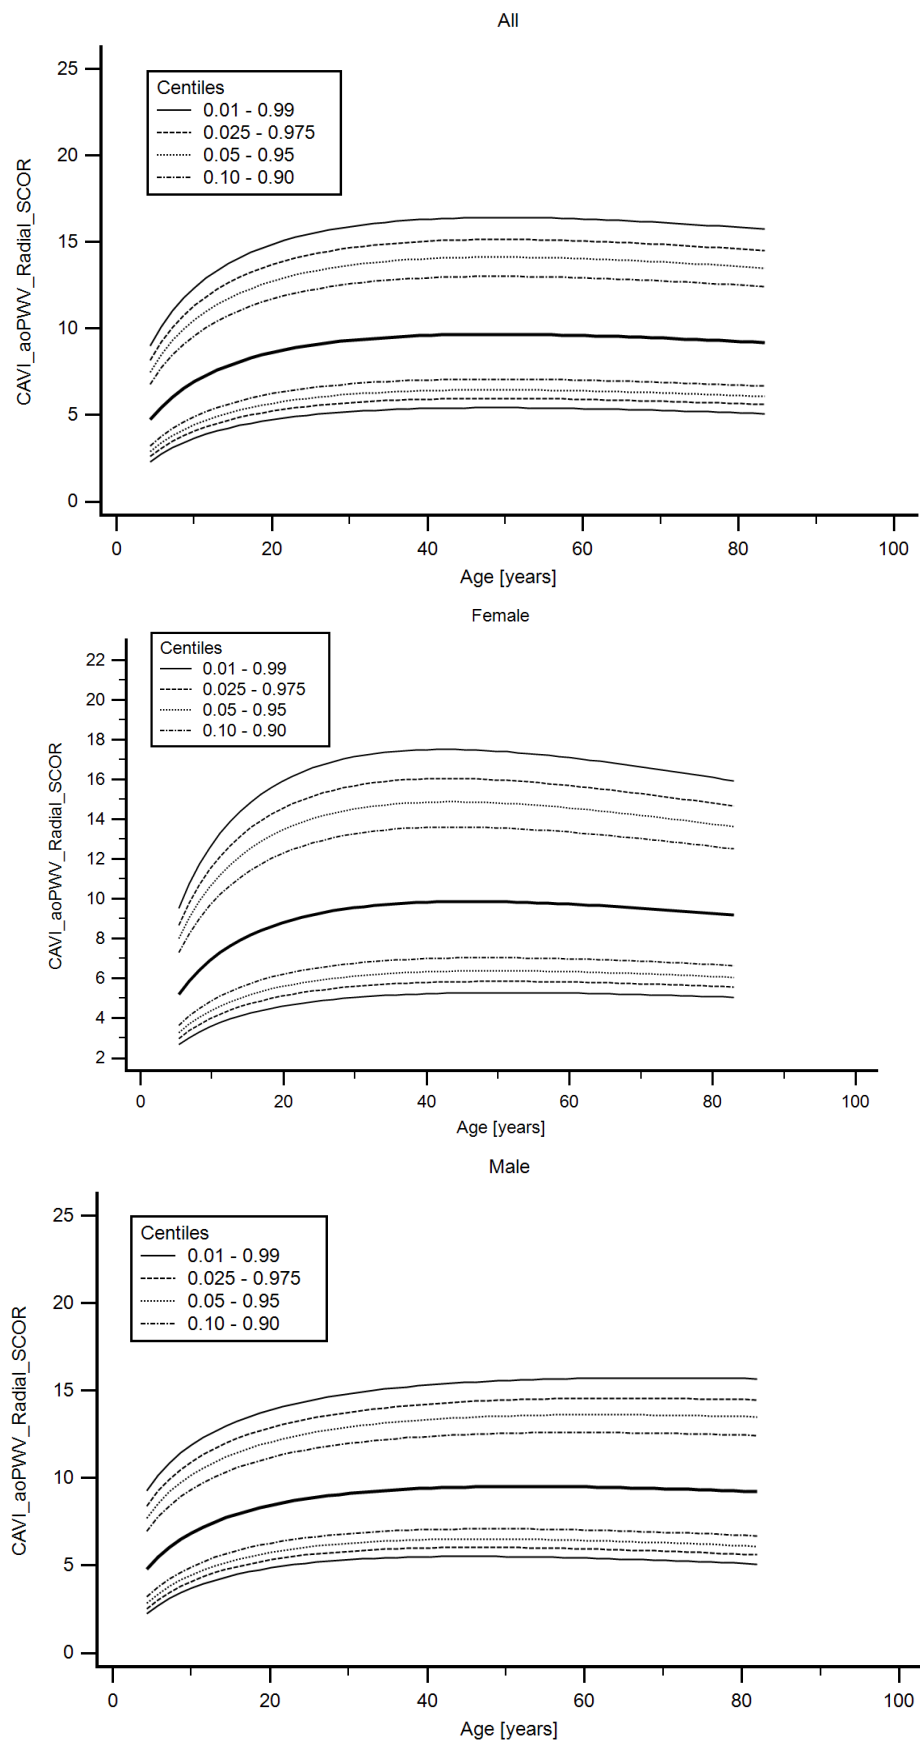

**Figure S8.** Age-related profiles for CAVI\_aoPWV\_Radial\_SCOR, for subjects included in RIs group.



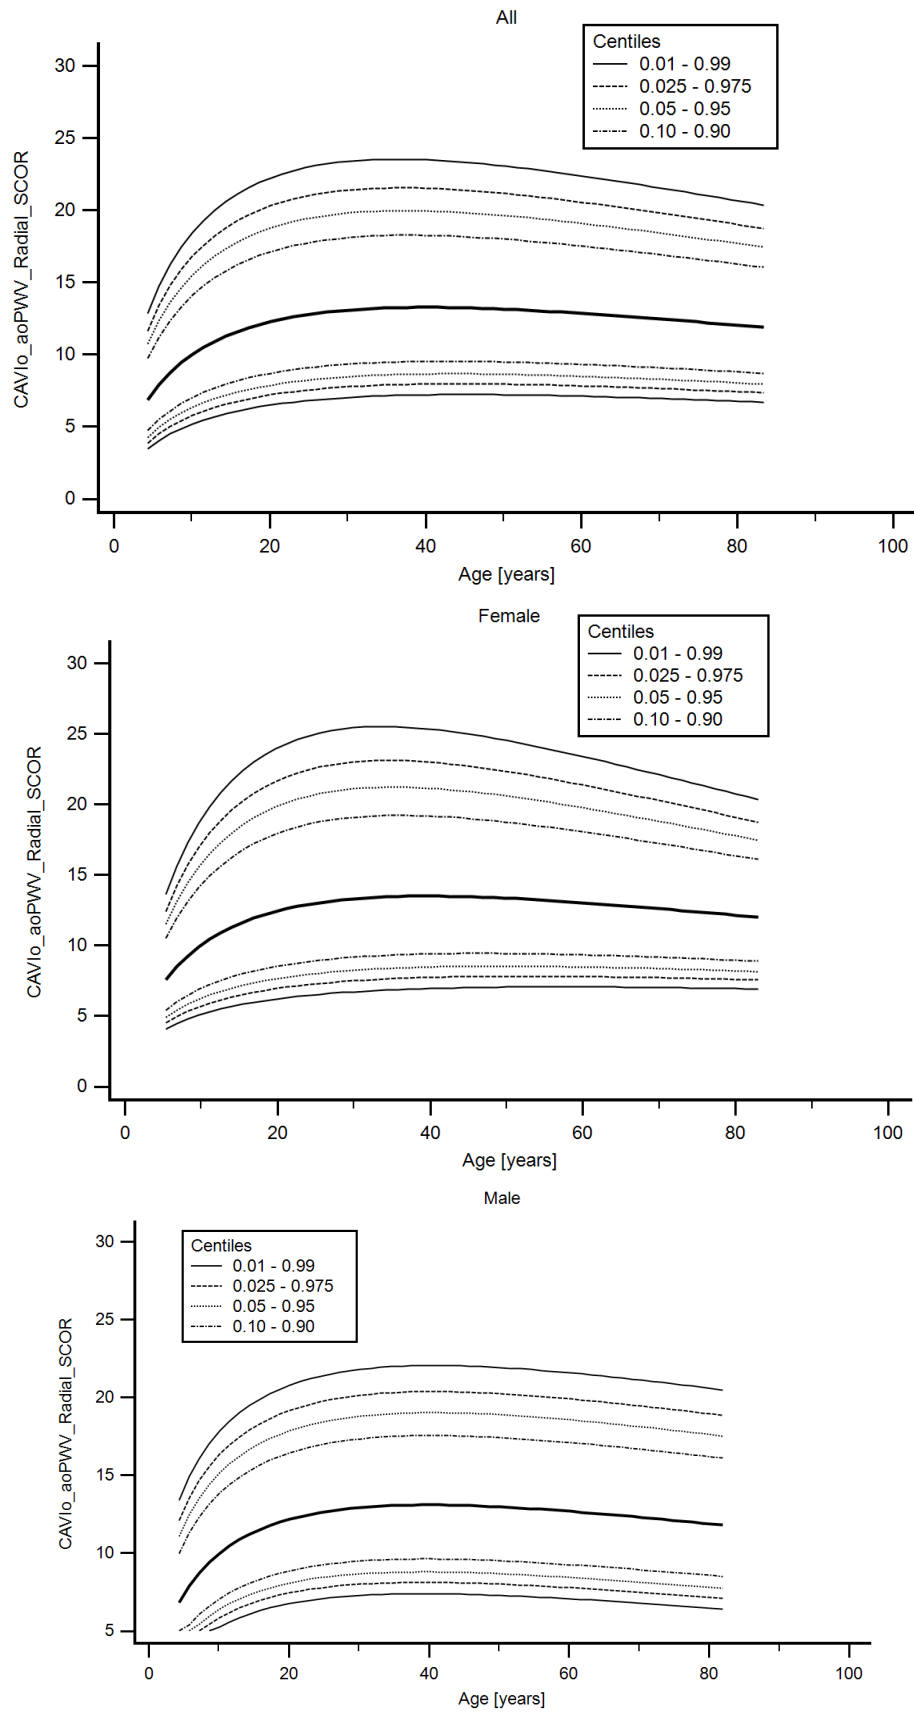

**Figure S9.** Age-related profiles for CAVIo\_aoPWV\_Radial\_SCOR, for subjects included in RIs group.

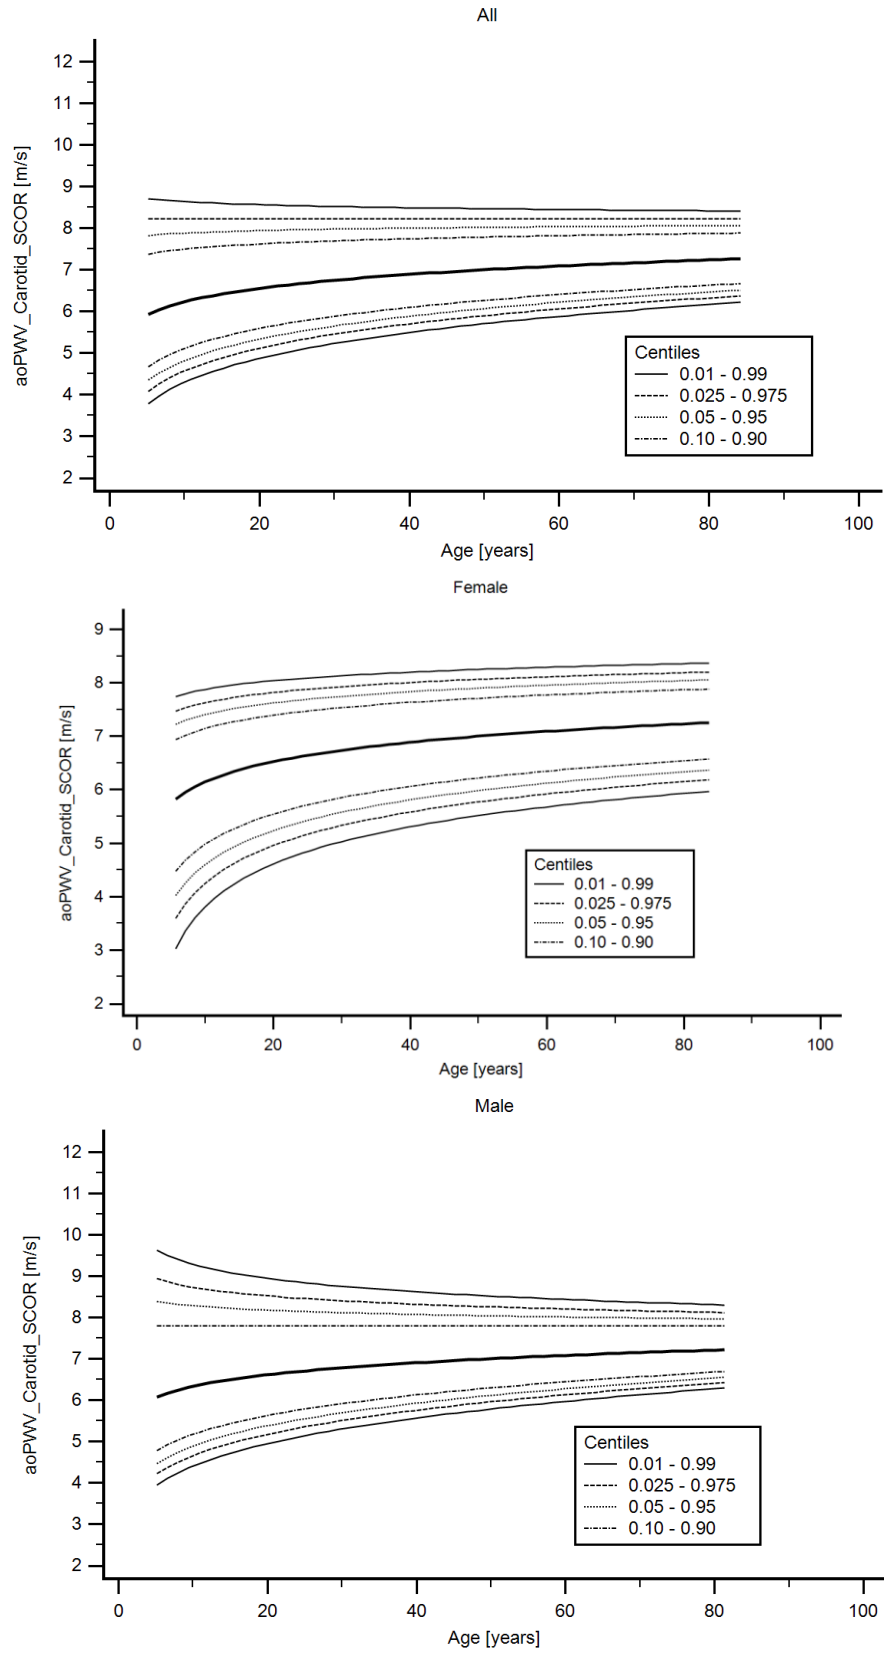

**Figure S10.** Age-related profiles for aoPWV\_Carotid\_SCOR, for subjects included in RIs group.

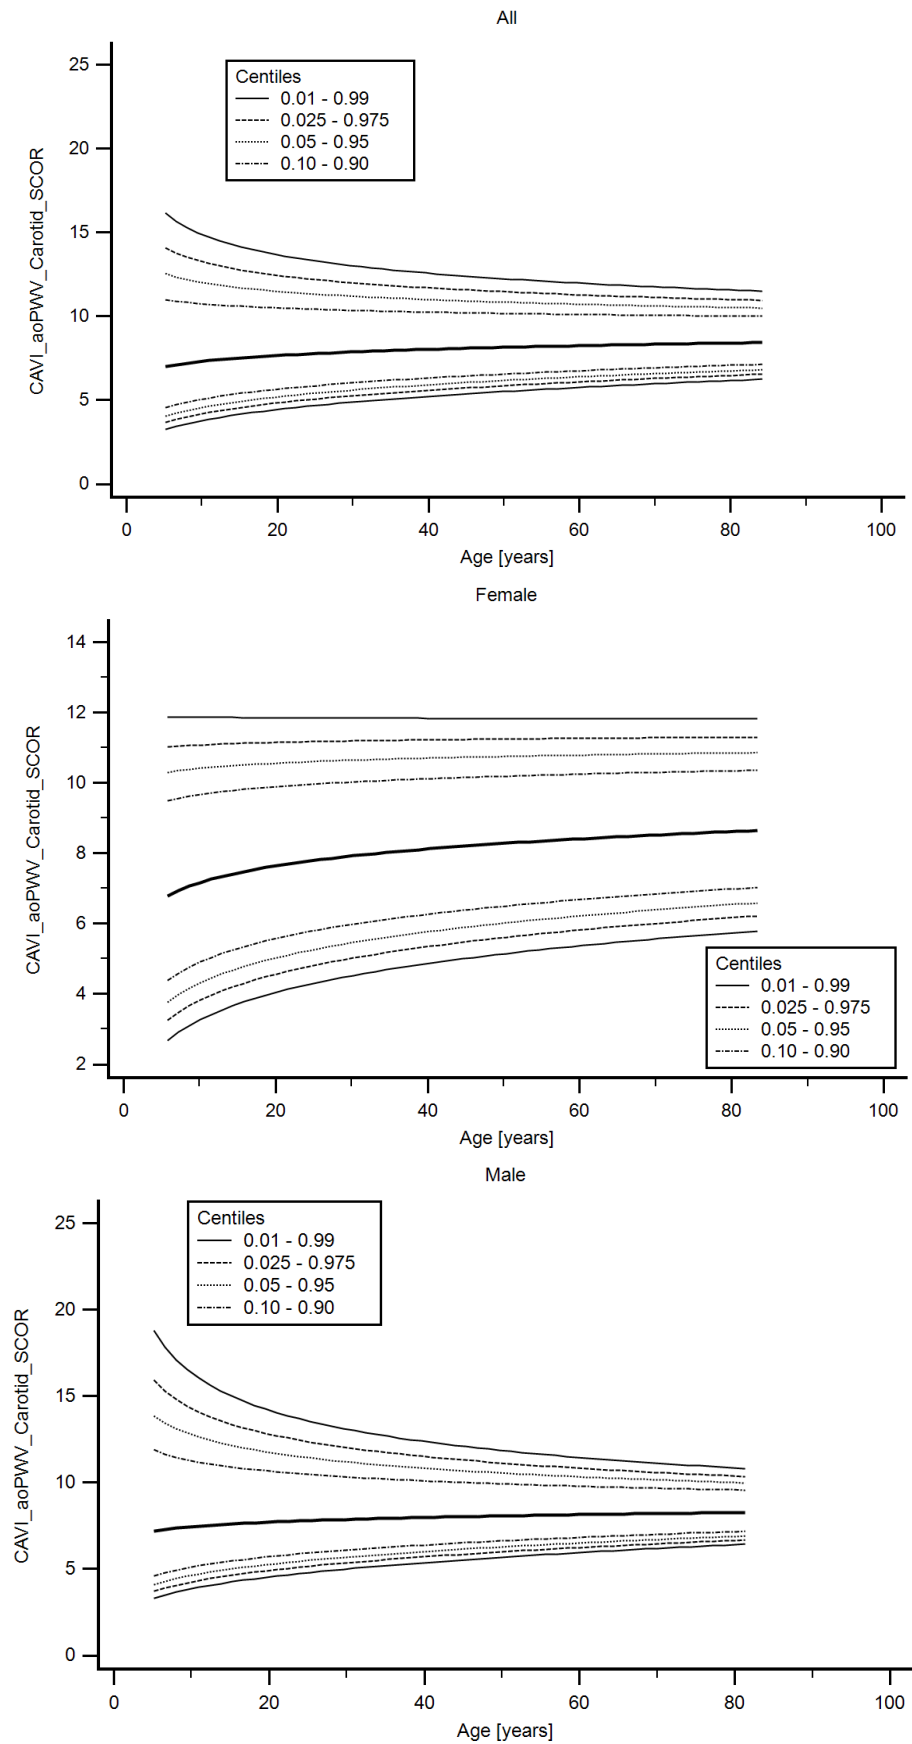

**Figure S11.** Age-related profiles for CAVI\_aoPWV\_Carotid\_SCOR, for subjects included in RIs group.

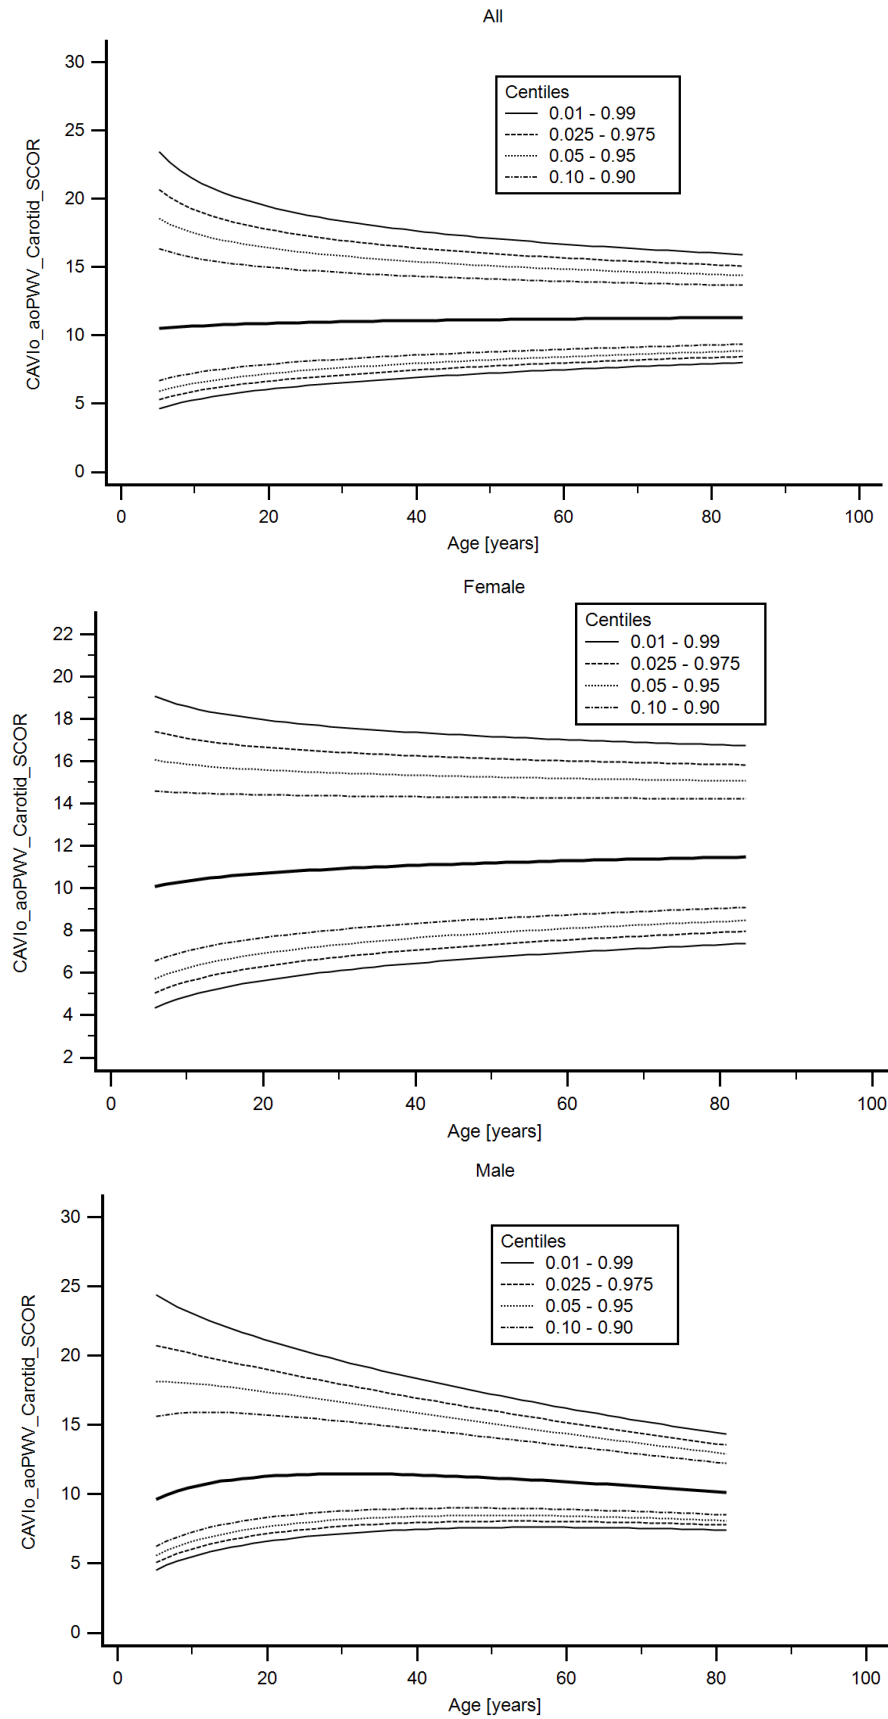

**Figure S12.** Age-related profiles for CAVIo\_aoPWV\_Carotid\_SCOR, for subjects included in RIs group.

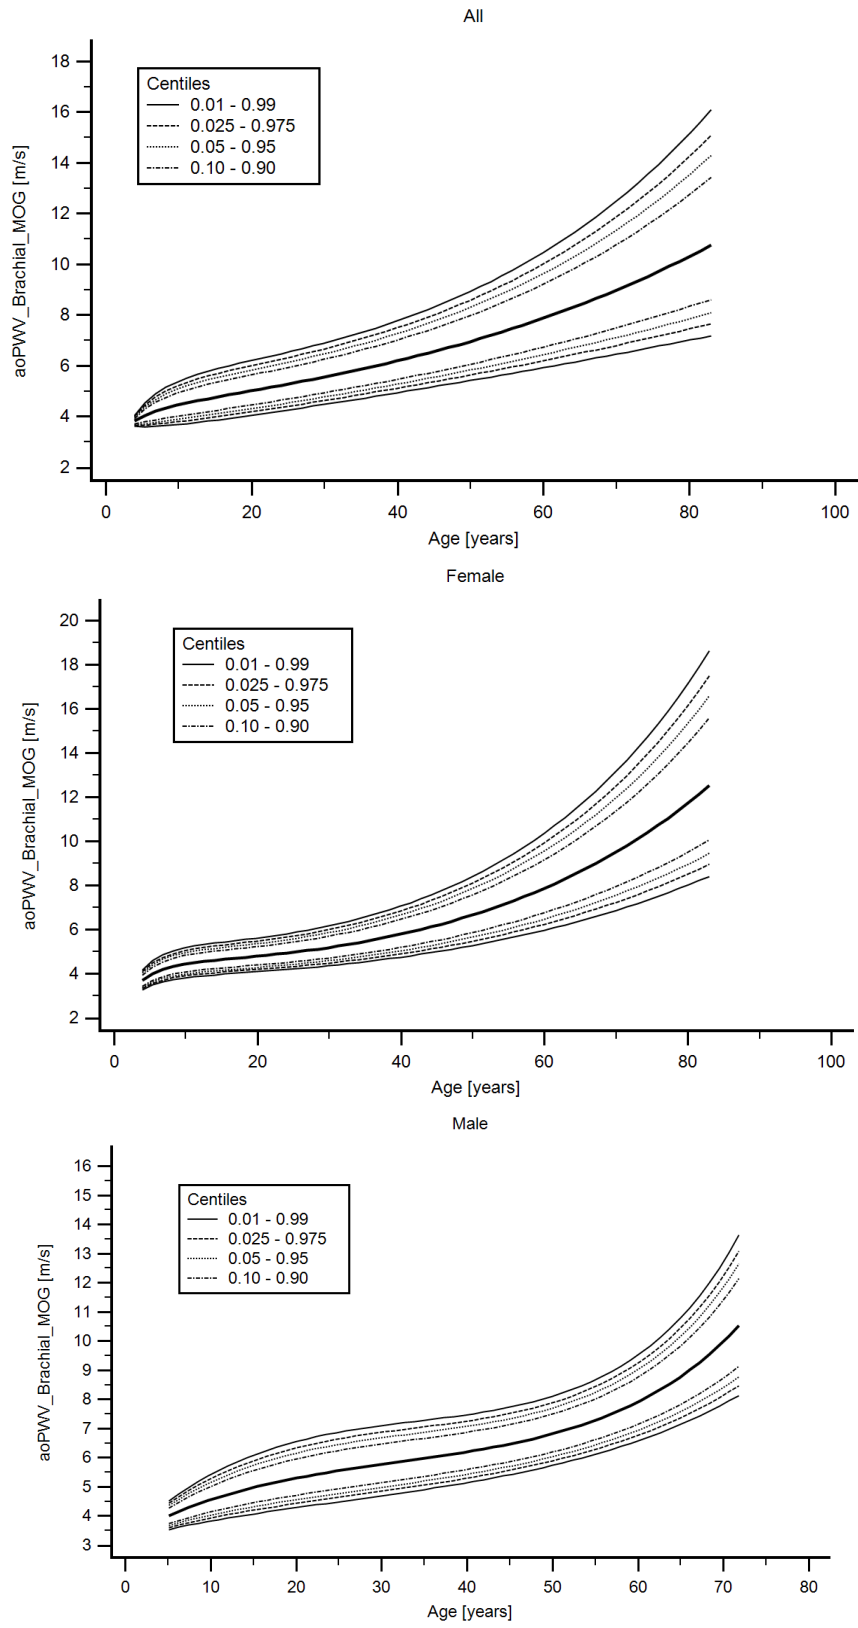

**Figure S13.** Age-related profiles for aoPWV\_Brachial\_MOG, for subjects included in RIs group.

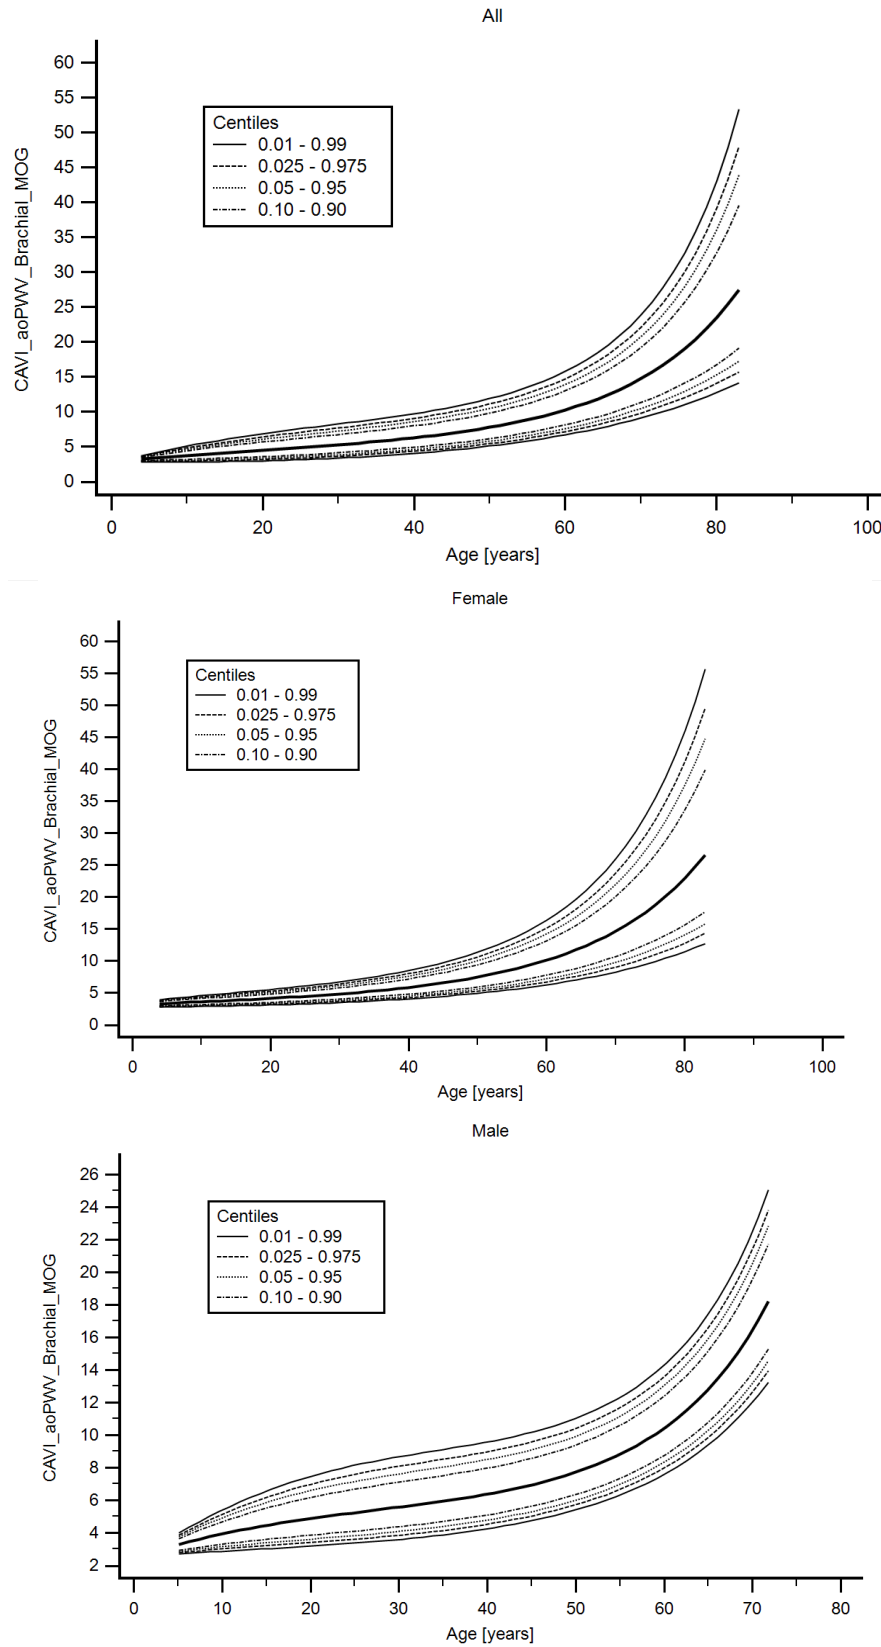

**Figure S14.** Age-related profiles for CAVI\_aopWV\_Brachial\_MOG, for subjects included in RIs group.

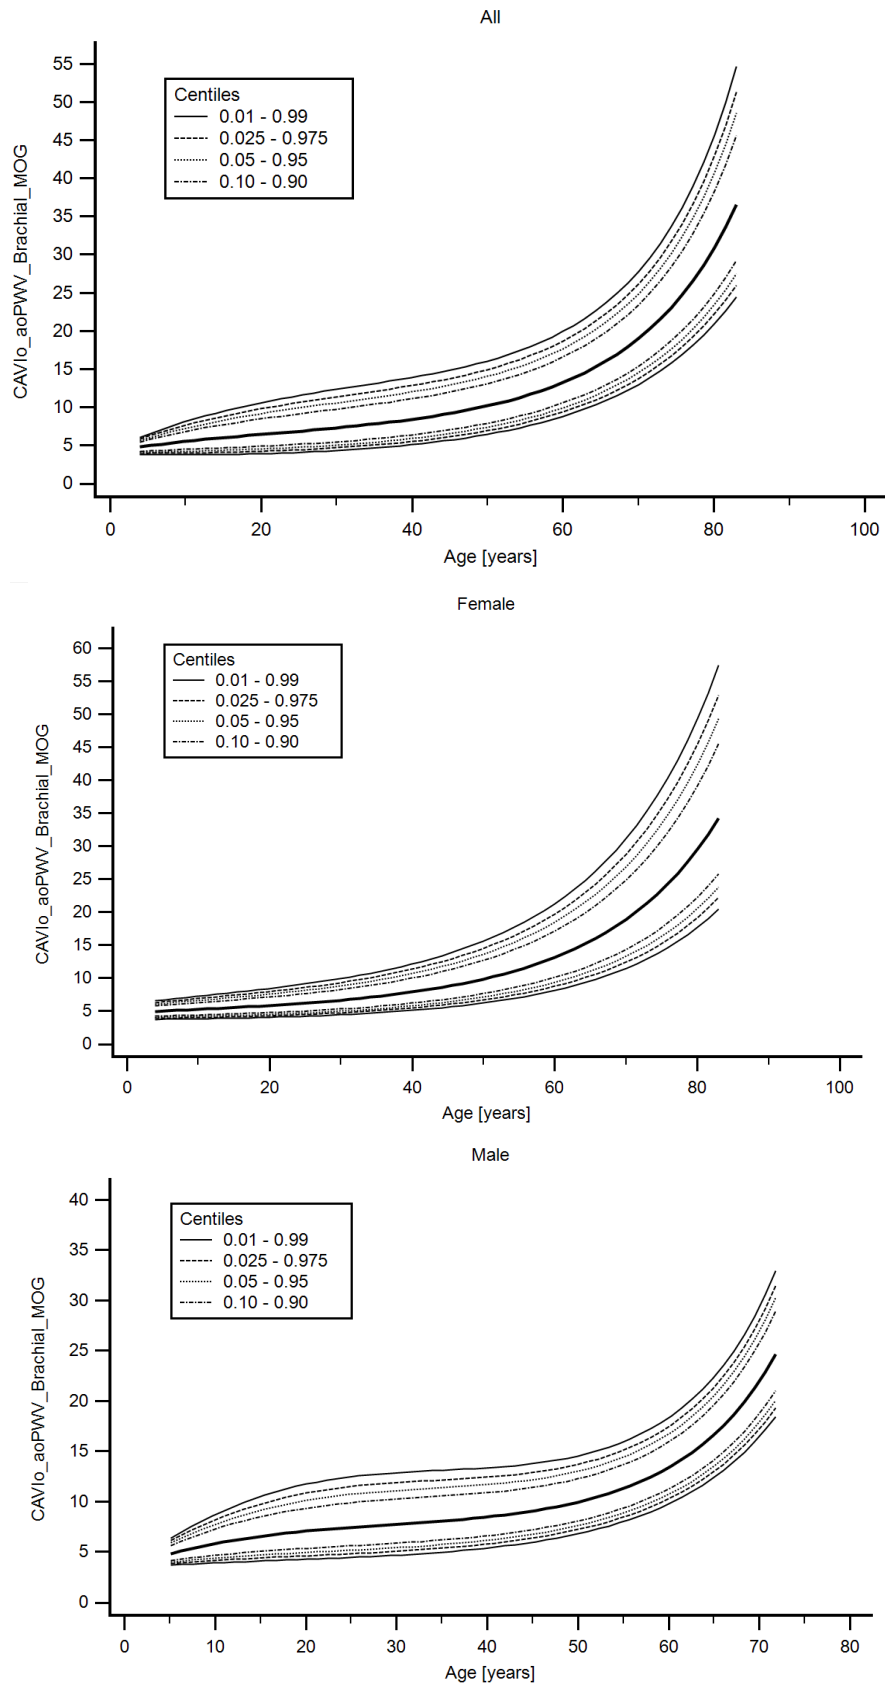

**Figure S15.** Age-related profiles for  $CAV_{Io\_aoPWV\_Brachial\_MOG}$ , for subjects included in RIs group.

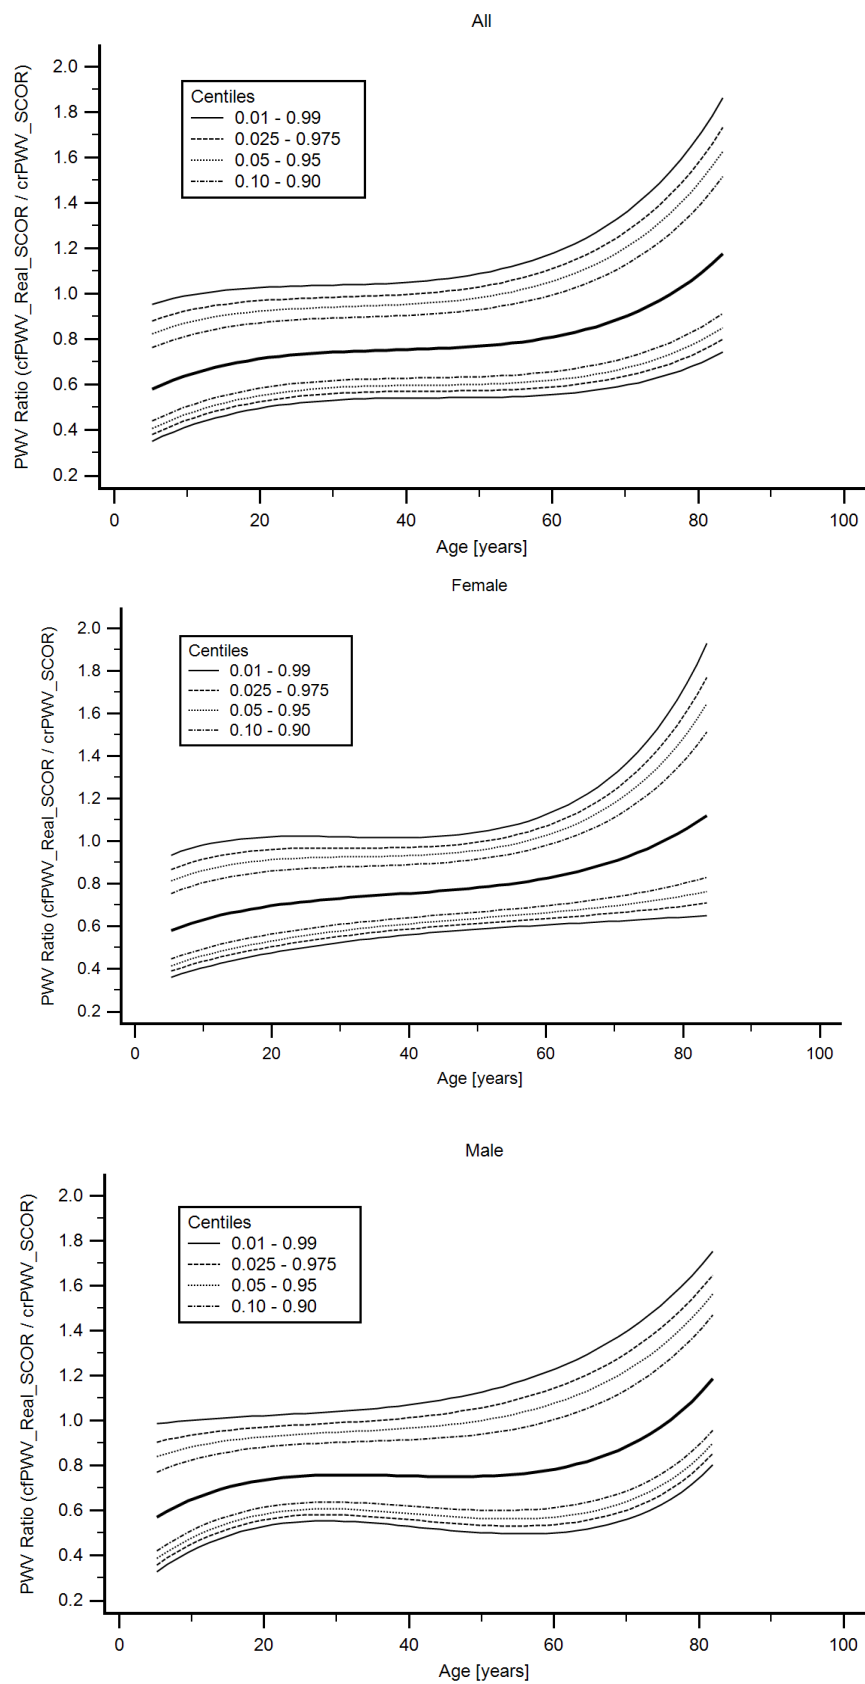

**Figure S16.** Age-related profiles for PWV\_Ratio, for subjects included in RIs group.



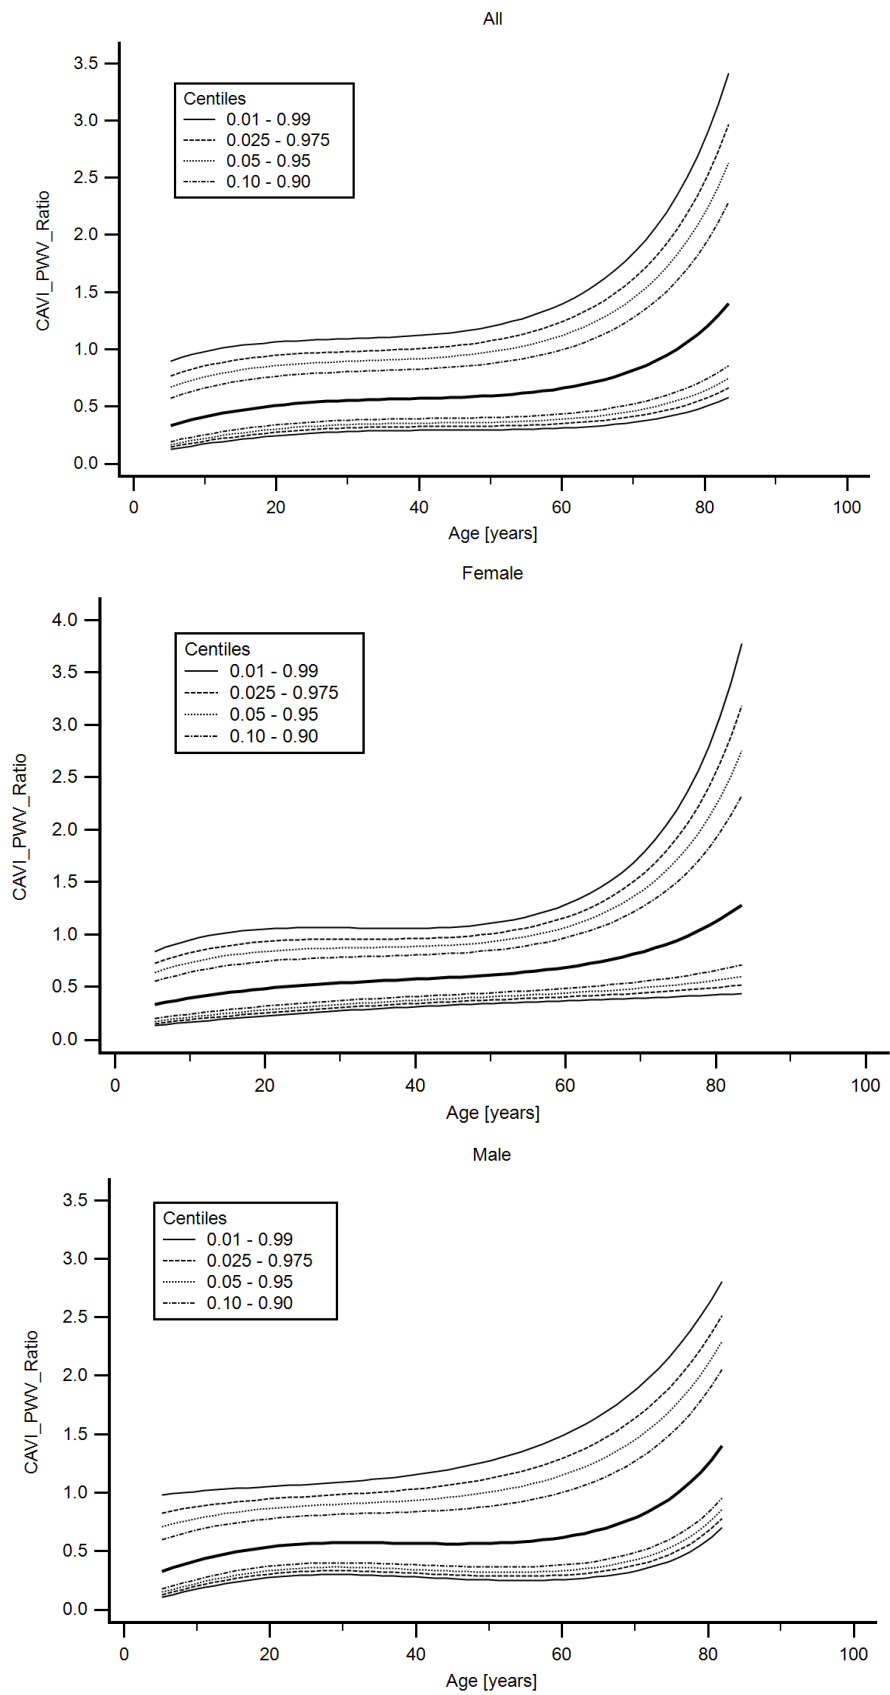

**Figure S17.** Age-related profiles for CAVI\_PWV\_Ratio, for subjects included in RIs group.

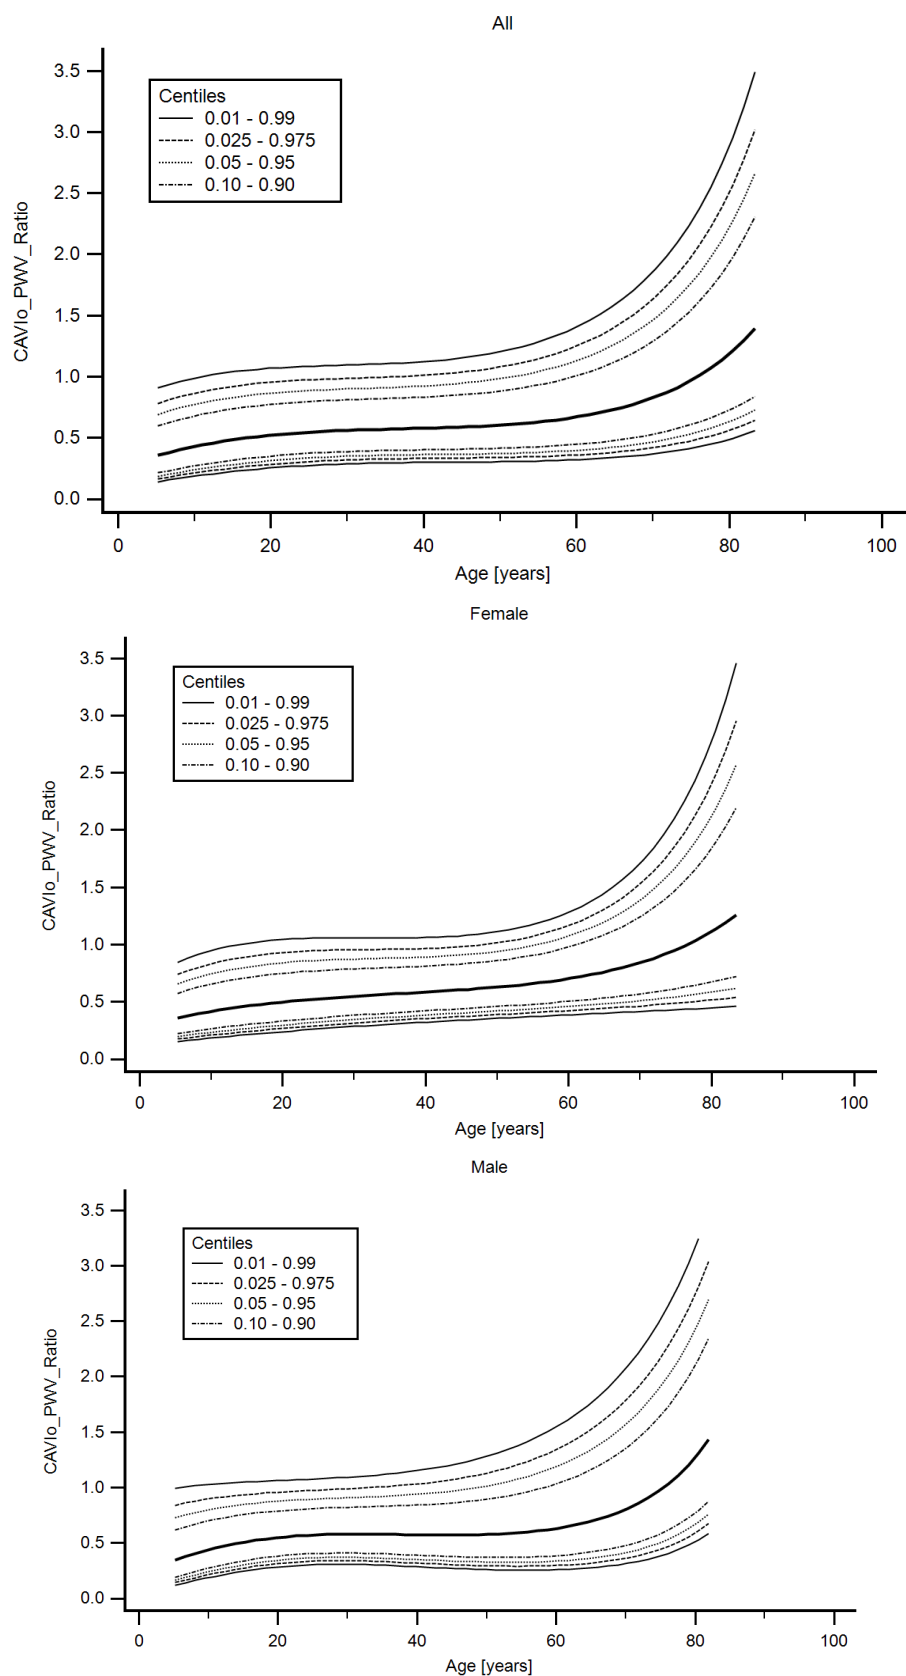

**Figure S18.** Age-related profiles for CAVio\_PWV\_Ratio, for subjects included in RIs group.
